# Supplementary material
Source: PubMed Central journal article supplement (PMC4375076)
Supplement: supp_db14-0667_DB140667SupplementaryData.pdf [file supp_db14-0667_DB140667SupplementaryData.pdf]

SUPPLEMENTARY DATA

**Supplementary Table 1. Table with medication use of participants**

|    | Code  | Oral Glucose Lowering |               | Cholesterol lowering | Blood pressure control |                   |               | Other             |                        |                      |              |
|----|-------|-----------------------|---------------|----------------------|------------------------|-------------------|---------------|-------------------|------------------------|----------------------|--------------|
|    |       | Metformin             | Sulfonylureas | Statins              | ACE inhibitors         | AT-II antagonists | Beta blockers | Uricostatic drugs | Proton pump inhibitors | Acetylsalicylic acid | Psycholytica |
| 1  | AJ03  | 1                     | 1             |                      |                        |                   |               |                   |                        |                      |              |
| 2  | JB07  | 1                     |               |                      | 1                      |                   |               |                   |                        |                      |              |
| 3  | JC01  | 1                     | 1             |                      |                        | 1                 |               |                   |                        |                      |              |
| 4  | RS06  | 1                     |               |                      | 1                      | 1                 | 1             | 1                 |                        |                      |              |
| 5  | LS04  | 1                     | 1             | 1                    |                        |                   |               | 1                 |                        |                      |              |
| 6  | AI09  | 1                     | 1             | 1                    |                        |                   | 1             |                   | 1                      | 1                    |              |
| 7  | HP08  | 1                     |               | 1                    |                        | 1                 |               |                   |                        |                      | 1            |
| 8  | JV03  | 1                     |               |                      | 1                      |                   | 1             |                   |                        |                      |              |
| 9  | MH09  | 1                     |               |                      |                        |                   |               |                   |                        |                      | 1            |
| 10 | ES06  | 1                     |               | 1                    |                        |                   |               |                   |                        |                      | 1            |
| 11 | UZ02  | 1                     |               |                      | 1                      |                   | 1             | 1                 |                        |                      | 1            |
| 12 | HM03  | 1                     |               |                      |                        |                   |               |                   |                        |                      |              |
| 13 | RR04  | 1                     |               |                      |                        |                   |               |                   |                        |                      |              |
| 14 | HK08  | 1                     |               |                      |                        | 1                 |               |                   |                        |                      |              |
| 15 | GT09  |                       |               |                      |                        |                   |               |                   |                        |                      |              |
| 16 | LL12  | 1                     |               |                      |                        |                   |               |                   |                        |                      |              |
| 17 | KH15  | 1                     |               |                      |                        |                   |               | 1                 | 1                      |                      |              |
| 18 | IS16  | 1                     |               | 1                    |                        |                   |               | 1                 |                        | 1                    |              |
| 19 | JP18  | 1                     |               |                      |                        | 1                 |               |                   |                        |                      |              |
| 20 | MK20  | 1                     |               | 1                    |                        | 1                 |               | 1                 |                        |                      |              |
| 21 | RUR19 | 1                     |               |                      |                        |                   |               |                   |                        |                      |              |
|    |       | 20                    | 4             | 6                    | 4                      | 6                 | 4             | 6                 | 2                      | 2                    | 4            |
